# Supplementary material
Source: PubMed Central journal article supplement (PMC4571786)
Supplement: supp_the2015-0105_Sullivan-15-105.pdf [file supp_the2015-0105_Sullivan-15-105.pdf]

## Overview

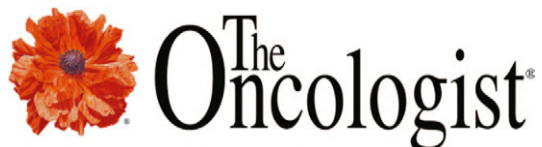

The official journal of the Society for Translational Oncology

**First Published Online May 18, 2015**

**DOI:** 10.1634/theoncologist.2015-0105

**Title:** A Phase I Trial of Bortezomib and Sorafenib in Advanced Malignant Melanoma

**Authors:** Ryan J. Sullivan,<sup>a</sup> Nageatte Ibrahim,<sup>b</sup> Donald P. Lawrence,<sup>a</sup> Julie Aldridge,<sup>b</sup> Anita Giobbie-Hurder,<sup>b</sup> F. Stephen Hodi,<sup>b</sup> Keith T. Flaherty,<sup>a</sup> Christine Conley,<sup>c</sup> James W. Mier,<sup>c</sup> Michael B. Atkins,<sup>d</sup> David F. McDermott<sup>c</sup>

<sup>a</sup>Massachusetts General Hospital Cancer Center, Boston, Massachusetts, USA; <sup>b</sup>Dana-Farber Cancer Institute, Boston, Massachusetts, USA; <sup>c</sup>Beth Israel Deaconess Medical Center, Boston, Massachusetts, USA; <sup>d</sup>Georgetown Lombardi Comprehensive Cancer Center, Washington, D.C., USA

**ClinicalTrials.gov Identifier:** NCT01078961

**Sponsor(s):** Dana-Farber/Harvard Cancer Center

**Principal Investigator:** Ryan J. Sullivan

**IRB Approved:** Yes

### Disclosures

**Ryan J. Sullivan:** Astex Pharmaceuticals (C/A), Boehringer Ingelheim (Other: adverse event adjudication); **Nageatte Ibrahim:** GSK, Merck (E, OI); **F. Stephen Hodi:** Novartis, Merck, Genetech (C/A), Bristol Myers Squibb (RF, IP); **James W. Mier:** X4 Pharmaceuticals (RF), Acceleron (IP); **David F. McDermott:** BMS, Merck (C/A); **Julie Aldridge:** EMD Serono (E). The other authors indicated no financial relationships.

(C/A) Consulting/advisory relationship; (RF) Research funding; (E) Employment; (ET) Expert testimony; (H) Honoraria received; (OI) Ownership interests; (IP) Intellectual property rights/inventor/patent holder; (SAB) Scientific advisory board

## Lessons Learned

- This study is a rare example of effective doses of both targeted agents being both administered and tolerated.
- This combination should not be used in melanoma.

## Author Summary: Abstract and Brief Discussion

### Background

Sorafenib and bortezomib affect BCL family member expression. We previously demonstrated that bortezomib augmented sorafenib-mediated cytotoxicity in melanoma cell lines in vitro. We aimed to combine sorafenib 400 mg b.i.d. with increasing doses of weekly bortezomib.

### Methods

Patients with metastatic melanoma were enrolled in dose-escalation cohorts to determine the maximum tolerated dose (MTD) of sorafenib (twice daily) in combination with bortezomib (weekly for 3 of 4 weeks). The MTD was defined as the highest dose level at which less than 33% of patients exhibited a dose-limiting toxicity (DLT). Efficacy, as measured by 6-month progression-free survival and response rate per RECIST, was documented.

### Results

Eleven patients were enrolled at three dose levels. DLTs (fatigue and rash) were seen in two of three patients at the highest dose level. Five patients were enrolled for sorafenib 400 mg b.i.d. and bortezomib 1.0 mg/m<sup>2</sup> weekly for 3 of every 4 weeks;

none had DLTs, and this dose level was defined as the MTD. Of 10 evaluable patients, no responses were seen. Two of 11 patients (18%) remained progression free for longer than 6 months.

## Conclusion

The combination of sorafenib and bortezomib is safe but not active in patients with melanoma.

## Discussion

The combination of sorafenib and bortezomib had been tested in a phase I trial with the MTD determined to be sorafenib 200 mg b.i.d. and bortezomib 1 mg/m<sup>2</sup> on days 1, 4, 8, and 11 of a 21-day cycle [1]. Although these two agents had been tested in combination previously, we designed our study to maximize exposure to sorafenib by treating patients with weekly bortezomib, a regimen that had shown effectiveness in patients with myeloma with a favorable toxicity profile, compared with days 1, 4, 8, and 11 of a 21-day cycle [1–3]. In this phase I dose-escalation study, we identified sorafenib 400 mg b.i.d. with weekly bortezomib 1.0 mg/m<sup>2</sup> for 3 of 4 weeks as the MTD. Although a dose-escalation cohort was planned, given the lack of clinical activity at or above the MTD (no responses, 1 of 8 with stable disease at 24 weeks) and the increasing therapeutic options for patients with metastatic melanoma, the study was closed after determination of the MTD.

The standard of care for melanoma has changed dramatically over the past 5 years when this study was conceived, given the emergence of effective BRAF-targeted therapy and immune checkpoint inhibitors, leading to approval of 6 agents (BRAF inhibitors vemurafenib and dabrafenib, the MEK inhibitor trametinib, the anti-CTLA4 antibody ipilimumab, and the anti-PD1 antibodies pembrolizumab and nivolumab) by the U.S. Food and Drug Administration since 2011 [4–11]. Still, the majority of patients diagnosed with metastatic melanoma will die of their disease, and novel therapies and combination regimens are needed. Dual targeting of growth factor pathways and apoptosis is an approach that is building momentum, and four phase I clinical trials (NCT02110355, NCT01989585, NCT01897116, NCT02097225) based on compelling preclinical data have been opened recently. Our study serves as an early example of this type of approach. It is hoped that more potent and specific growth factor inhibitors—such as selective BRAF and/or MEK inhibitors for *BRAF*-mutant melanoma or pan-RAF, MEK, or ERK inhibitors for *BRAF* wild-type melanoma in combination with agents that target specific cell-survival mechanisms (BCL-2 family, inhibitor of apoptosis proteins, HDM2, heat shock protein 90, autophagy)—will be an effective therapeutic strategy.

## Trial Information

|                              |                                        |
|------------------------------|----------------------------------------|
| Disease                      | Melanoma                               |
| Stage of disease / treatment | Metastatic / Advanced                  |
| Prior Therapy                | More than 2 prior regimens             |
| Type of study - 1            | Phase I                                |
| Type of study - 2            | Other                                  |
| Primary Endpoint             | Maximum Tolerated Dose                 |
| Secondary Endpoint           | Efficacy                               |
| Investigator's Analysis      | Drug Tolerable, Efficacy Indeterminate |

## Drug Information

|                            |                               |
|----------------------------|-------------------------------|
| Drug 1                     |                               |
| Generic/Working name       | Sorafenib                     |
| Trade name                 | Nexivar                       |
| Company name               | Bayer-Onyx                    |
| Drug type                  | Small molecule                |
| Drug class                 | Angiogenesis - VEGF           |
| Dose                       | Milligrams (mg) per flat dose |
| Route                      | Oral (po)                     |
| Schedule of Administration | Twice Daily                   |

|                                   |                                                    |
|-----------------------------------|----------------------------------------------------|
| <b>Drug 2</b>                     |                                                    |
| <b>Generic/Working name</b>       | Bortezomib                                         |
| <b>Trade name</b>                 | Velcade                                            |
| <b>Company name</b>               | Millennium Pharmaceuticals                         |
| <b>Drug type</b>                  | Small molecule                                     |
| <b>Drug class</b>                 | Proteasome                                         |
| <b>Dose</b>                       | Milligrams (mg) per square meter (m <sup>2</sup> ) |
| <b>Route</b>                      | IV                                                 |
| <b>Schedule of Administration</b> | Weekly, 3 weeks on, 1 week off                     |

## Dose Escalation Table

| Dose Level | Dose of Drug: Sorafenib | Dose of Drug: Bortezomib                   | Number Enrolled | Number Evaluable for Toxicity |
|------------|-------------------------|--------------------------------------------|-----------------|-------------------------------|
| -1         | 200 mg b.i.d.           | 1.0 mg/m <sup>2</sup> IV days 1, 8, and 15 | 3               | 3                             |
| 1          | 400 mg b.i.d.           | 1.0 mg/m <sup>2</sup> IV days 1, 8, and 15 | 5               | 5                             |
| 2          | 400 mg b.i.d.           | 1.3 mg/m <sup>2</sup> IV days 1, 8, and 15 | 3               | 3                             |

## Patient Characteristics

|                                            |                                                                                                                                         |
|--------------------------------------------|-----------------------------------------------------------------------------------------------------------------------------------------|
| <b>Number of patients, male</b>            | 7                                                                                                                                       |
| <b>Number of patients, female</b>          | 4                                                                                                                                       |
| <b>Stage</b>                               | Stage IV                                                                                                                                |
| <b>Age</b>                                 | Median (range): 66 (33–74) years                                                                                                        |
| <b>Number of prior systemic therapies</b>  | Median (range): Not Collected                                                                                                           |
| <b>Performance Status</b>                  | ECOG<br><ul style="list-style-type: none"> <li>• 0 —</li> <li>• 1 —</li> <li>• 2 — 0</li> <li>• 3 — 0</li> <li>• Unknown — 0</li> </ul> |
| <b>Other</b>                               | Not Collected                                                                                                                           |
| <b>Cancer Types or Histologic Subtypes</b> | • Melanoma 11                                                                                                                           |

## Primary Assessment Method

### Control Arm: Melanoma

|                                           |                    |
|-------------------------------------------|--------------------|
| Number of patients enrolled               | 11                 |
| Number of patients evaluable for toxicity | 11                 |
| Number of patients evaluated for efficacy | 10                 |
| Evaluation method                         | Other              |
| Response assessment CR                    | 0                  |
| Response assessment PR                    | 0                  |
| Response assessment SD                    | <i>n</i> = 3<br>27 |
| Response assessment PD                    | <i>n</i> = 7<br>64 |
| Response assessment OTHER                 | <i>n</i> = 1<br>9  |

## Control Arm: Melanoma

|                                           |               |
|-------------------------------------------|---------------|
| Number of patients enrolled               | 11            |
| Number of patients evaluable for toxicity | 11            |
| Number of patients evaluated for efficacy | 10            |
| Evaluation method                         | Other         |
| Response assessment CR                    | 0             |
| Response assessment PR                    | 0             |
| Response assessment SD                    | $n = 3$<br>27 |
| Response assessment PD                    | $n = 7$<br>64 |
| Response assessment OTHER                 | $n = 1$<br>9  |

## Adverse Events

### Adverse Events At All Dose Levels, Cycle 1

| Name                                            | *NC/NA | 1      | 2     | 3     | 4     | 5  | All Grades |
|-------------------------------------------------|--------|--------|-------|-------|-------|----|------------|
| Musculoskeletal/Soft Tissue - Pain in extremity | 63.64% | 27.27% | 9.09% | 0%    | 0%    | 0% | 36%        |
| Fatigue (asthenia, lethargy, malaise)           | 63.64% | 27.27% | 9.09% | 0%    | 0%    | 0% | 36%        |
| Anorexia                                        | 72.73% | 27.27% | 0%    | 0%    | 0%    | 0% | 27%        |
| Cough                                           | 81.82% | 18.18% | 0%    | 0%    | 0%    | 0% | 18%        |
| Infection - Tooth infection                     | 90.91% | 9.09%  | 0%    | 0%    | 0%    | 0% | 9%         |
| Nausea                                          | 63.64% | 36.36% | 0%    | 0%    | 0%    | 0% | 36%        |
| Gastrointestinal - Stomach Pain                 | 72.73% | 27.27% | 0%    | 0%    | 0%    | 0% | 27%        |
| Gastrointestinal - Gastrointestinal pain        | 90.91% | 9.09%  | 0%    | 0%    | 0%    | 0% | 9%         |
| Gastrointestinal - Abdominal pain               | 81.82% | 9.09%  | 9.09% | 0%    | 0%    | 0% | 18%        |
| Constipation                                    | 72.73% | 27.27% | 0%    | 0%    | 0%    | 0% | 27%        |
| Vomiting                                        | 72.73% | 27.27% | 0%    | 0%    | 0%    | 0% | 27%        |
| Neurology - Headache                            | 72.73% | 18.18% | 9.09% | 0%    | 0%    | 0% | 27%        |
| Hypertension                                    | 81.82% | 0%     | 9.09% | 9.09% | 0%    | 0% | 18%        |
| Neurology - Bilateral arm tremor                | 90.91% | 9.09%  | 0%    | 0%    | 0%    | 0% | 9%         |
| Diarrhea                                        | 81.82% | 9.09%  | 9.09% | 0%    | 0%    | 0% | 18%        |
| Rash: hand-foot skin reaction                   | 81.82% | 9.09%  | 0%    | 9.09% | 0%    | 0% | 18%        |
| Constitutional Symptoms - Chest Pain            | 90.91% | 9.09%  | 0%    | 0%    | 0%    | 0% | 9%         |
| Neuropathy: motor                               | 90.91% | 9.09%  | 0%    | 0%    | 0%    | 0% | 9%         |
| Pruritus/itching                                | 72.73% | 27.27% | 0%    | 0%    | 0%    | 0% | 27%        |
| Phosphate, serum-low (hypophosphatemia)         | 90.91% | 0%     | 9.09% | 0%    | 0%    | 0% | 9%         |
| Cognitive disturbance                           | 90.91% | 0%     | 9.09% | 0%    | 0%    | 0% | 9%         |
| Heartburn/dyspepsia                             | 90.91% | 0%     | 9.09% | 0%    | 0%    | 0% | 9%         |
| Weight loss                                     | 90.91% | 9.09%  | 0%    | 0%    | 0%    | 0% | 9%         |
| Urinary frequency/urgency                       | 90.91% | 0%     | 9.09% | 0%    | 0%    | 0% | 9%         |
| Renal/Genitourinary - Hematuria                 | 90.91% | 9.09%  | 0%    | 0%    | 0%    | 0% | 9%         |
| ALT, SGPT (serum glutamic pyruvic transaminase) | 90.91% | 9.09%  | 0%    | 0%    | 0%    | 0% | 9%         |
| Rigors/chills                                   | 90.91% | 9.09%  | 0%    | 0%    | 0%    | 0% | 9%         |
| Dermatology/Skin - Rash: Maculopapular          | 90.91% | 0%     | 0%    | 9.09% | 0%    | 0% | 9%         |
| Lymphopenia                                     | 90.91% | 0%     | 0%    | 0%    | 9.09% | 0% | 9%         |
| Pain - Back pain                                | 90.91% | 9.09%  | 0%    | 0%    | 0%    | 0% | 9%         |
| Taste alteration (dysgeusia)                    | 90.91% | 9.09%  | 0%    | 0%    | 0%    | 0% | 9%         |

|                                                                                                      |        |        |       |       |    |    |     |
|------------------------------------------------------------------------------------------------------|--------|--------|-------|-------|----|----|-----|
| Potassium, serum-low (hypokalemia)                                                                   | 90.91% | 9.09%  | 0%    | 0%    | 0% | 0% | 9%  |
| Lipase                                                                                               | 81.82% | 0%     | 9.09% | 9.09% | 0% | 0% | 18% |
| Amylase                                                                                              | 81.82% | 18.18% | 0%    | 0%    | 0% | 0% | 18% |
| Mucositis/stomatitis (functional/symptomatic)                                                        | 81.82% | 18.18% | 0%    | 0%    | 0% | 0% | 18% |
| Cough                                                                                                | 90.91% | 9.09%  | 0%    | 0%    | 0% | 0% | 9%  |
| Dry skin                                                                                             | 90.91% | 9.09%  | 0%    | 0%    | 0% | 0% | 9%  |
| Secondary Malignancy - possibly related to cancer treatment (Specify, __)                            | 90.91% | 0%     | 0%    | 9.09% | 0% | 0% | 9%  |
| Fever (in the absence of neutropenia, where neutropenia is defined as ANC <1.0 × 10 <sup>9</sup> /L) | 90.91% | 9.09%  | 0%    | 0%    | 0% | 0% | 9%  |
| Bruising (in absence of Grade 3 or 4 thrombocytopenia)                                               | 90.91% | 9.09%  | 0%    | 0%    | 0% | 0% | 9%  |
| Tremor                                                                                               | 90.91% | 9.09%  | 0%    | 0%    | 0% | 0% | 9%  |
| Musculoskeletal/Soft Tissue - Arthralgia                                                             | 90.91% | 9.09%  | 0%    | 0%    | 0% | 0% | 9%  |
| Dyspnea (shortness of breath)                                                                        | 90.91% | 9.09%  | 0%    | 0%    | 0% | 0% | 9%  |
| Hemorrhage/Bleeding - Epistaxis                                                                      | 90.91% | 9.09%  | 0%    | 0%    | 0% | 0% | 9%  |

\*No Change from Baseline/No Adverse Event

## Dose Limiting Toxicities

| Dose Level | Dose of Drug: Sorafenib | Dose of Drug: Bortezomib                   | Number Enrolled | Number Evaluable for Toxicity | Number with a Dose Limiting Toxicity | Dose Limiting Toxicity Information |
|------------|-------------------------|--------------------------------------------|-----------------|-------------------------------|--------------------------------------|------------------------------------|
| -1         | 200 mg b.i.d.           | 1.0 mg/m <sup>2</sup> IV days 1, 8, and 15 | 3               | 3                             | 0                                    |                                    |
| 1          | 400 mg b.i.d.           | 1.0 mg/m <sup>2</sup> IV days 1, 8, and 15 | 5               | 5                             | 0                                    |                                    |
| 2          | 400 mg b.i.d.           | 1.3 mg/m <sup>2</sup> IV days 1, 8, and 15 | 3               | 3                             | 2                                    |                                    |

## Assessment, Analysis, and Discussion

### Completion

Study completed

### Investigator's Assessment

Drug Tolerable, Efficacy Indeterminate

### Discussion

The standard of care for metastatic melanoma has changed dramatically from 6 years ago when this study was conceived. With the emergence of effective BRAF-targeted therapy in patients with *BRAF*-mutant melanoma and immune checkpoint inhibitors for patients with metastatic melanoma agnostic of molecular subtyping, five agents have received approval (BRAF inhibitors vemurafenib and dabrafenib, the MEK inhibitor trametinib, the anti-CTLA4 antibody ipilimumab, and the anti-PD1 antibody pembrolizumab) by the U.S. Food and Drug Administration since 2011 [4–11]. Still, the majority of patients diagnosed with metastatic melanoma will die of their disease, and novel therapies and combination regimens are needed. Dual targeting of growth factor pathways and apoptosis is an approach that is building momentum, and four phase I clinical trials (NCT02110355, NCT01989585, NCT01897116, NCT02097225) based on compelling preclinical data have been opened recently.

Our study serves as an early example of this type of approach. In preclinical testing, we and others identified that bortezomib enhanced sorafenib-mediated toxicity in a variety of cell lines [12, 13]. Given these data, a dose-escalation trial of sorafenib and bortezomib was opened and identified sorafenib 200 mg orally twice daily with bortezomib 1.0 mg/m<sup>2</sup> on days 1, 4, 8, and 11 of a 21-day cycle as the recommended phase II dose [1]. Given the lack of effective therapies for melanoma at the time, our preclinical data, and the fact that sorafenib 400 mg b.i.d. was being evaluated in combination with chemotherapy at the time in patients with previously untreated melanoma, we designed a melanoma-specific phase I trial to identify a maximally tolerated dose (MTD) of bortezomib in combination with sorafenib 400 mg orally b.i.d. Because weekly bortezomib had been shown to be reasonably effective with a favorable toxicity profile compared with days 1, 4, 8, and 11 of a 21-day cycle, we elected to use escalating doses of weekly bortezomib [2, 3].

In this phase I dose-escalation study, we identified sorafenib 400 mg b.i.d. with weekly bortezomib 1.0 mg/m<sup>2</sup> for 3 of 4 weeks as the MTD. Specifically, 11 patients were enrolled at three dose levels (Table 1), and dose-limiting toxicities (fatigue and rash) were seen in 2 of 3 patients at the highest dose level (sorafenib 400 mg b.i.d. and bortezomib 1.3 mg/m<sup>2</sup> on days 1, 8, and 15) (Table 2). Five patients were enrolled to sorafenib 400 mg b.i.d. and bortezomib 1.0 mg/m<sup>2</sup> weekly, and none had DLTs; this dose level was defined as the MTD. Of 10 evaluable patients, no responses were seen; however, 2 of 11 patients (18%) remained progression free for longer than 6 months. Furthermore, no unexpected toxicities arose because all documented adverse effects had been seen previously with sorafenib and/or bortezomib.

Although a dose-expansion cohort was planned, given the lack of clinical activity at or above the MTD (no responses, 1 of 8 patents with stable disease at 24 weeks) and the increasing therapeutic options for patients with metastatic melanoma, the study was closed after determination of the MTD. Still, this protocol represents the type of trials that are critical in the targeted therapy era: a plausibly effective combination of novel agents targeting different nodes of cancer signaling. It is hoped that more potent and specific growth factor inhibitors—such as selective BRAF and/or MEK inhibitors for *BRAF*-mutant melanoma or pan-RAF, MEK, or ERK inhibitors for *BRAF* wild-type melanoma, in combination with agents that target specific cell survival mechanisms (BCL-2 family, inhibitor of apoptosis proteins, HDM2, heat shock protein 90, autophagy)—will prove to be a more effective therapeutic strategy.

## References

1. Kumar SK, Jett J, Marks R et al. Phase 1 study of sorafenib in combination with bortezomib in patients with advanced malignancies. *Invest New Drugs* 2013;31:1201–1206.
2. Hainsworth JD, Spigel DR, Barton J et al. Weekly treatment with bortezomib for patients with recurrent or refractory multiple myeloma: A phase 2 trial of the Minnie Pearl Cancer Research Network. *Cancer* 2008;113:765–771.
3. Suvannasankha A, Smith GG, Juliar BE et al. Weekly bortezomib/methylprednisolone is effective and well tolerated in relapsed multiple myeloma. *Clin Lymphoma Myeloma* 2006;7:131–134.
4. Chapman PB, Hauschild A, Robert C et al. Improved survival with vemurafenib in melanoma with BRAF V600E mutation. *N Engl J Med* 2011;364:2507–2516.
5. Flaherty KT, Infante JR, Daud A et al. Combined BRAF and MEK inhibition in melanoma with BRAF V600 mutations. *N Engl J Med* 2012;367:1694–1703.
6. Flaherty KT, Puzanov I, Kim KB et al. Inhibition of mutated, activated BRAF in metastatic melanoma. *N Engl J Med* 2010;363:809–819.
7. Flaherty KT, Robert C, Hersey P et al. Improved survival with MEK inhibition in BRAF-mutated melanoma. *N Engl J Med* 2012;367:107–114.
8. Hauschild A, Grob JJ, Demidov LV et al. Dabrafenib in BRAF-mutated metastatic melanoma: A multicentre, open-label, phase 3 randomised controlled trial. *Lancet* 2012;380:358–365.
9. Hodi FS, O'Day SJ, McDermott DF et al. Improved survival with ipilimumab in patients with metastatic melanoma. *N Engl J Med* 2010;363:711–723.
10. Robert C, Ribas A, Wolchok JD et al. Anti-programmed-death-receptor-1 treatment with pembrolizumab in ipilimumab-refractory advanced melanoma: A randomised dose-comparison cohort of a phase 1 trial. *Lancet* 2014;384:1109–1117.
11. Robert C, Thomas L, Bondarenko I et al. Ipilimumab plus dacarbazine for previously untreated metastatic melanoma. *N Engl J Med* 2011;364:2517–2526.
12. Yu C, Friday BB, Lai JP et al. Cytotoxic synergy between the multikinase inhibitor sorafenib and the proteasome inhibitor bortezomib in vitro: Induction of apoptosis through Akt and c-Jun NH2-terminal kinase pathways. *Mol Cancer Ther* 2006;5:2378–2387.
13. Sullivan RJ, Panka D, Cohen MB et al. In vitro synergy of the combination of sorafenib and ABT-737 in melanoma cell lines [abstract 5501]. Presented at: American Association for Cancer Research annual meeting; April 18–22, 2009; Denver, CO.

## Tables

**Table 1.** Adverse effects of sorafenib plus bortezomib

| <b>Adverse event</b>                 | <b>All grades,<br/>n (%)</b> | <b>Grades 3 and 4,<br/>n (%)</b> |
|--------------------------------------|------------------------------|----------------------------------|
| Fatigue                              | 6 (55)                       | 1 (9)                            |
| Anorexia                             | 3 (27)                       | 0                                |
| Weight loss                          | 3 (27)                       | 0                                |
| Mucositis                            | 3 (27)                       | 0                                |
| Sore throat                          | 2 (18)                       | 0                                |
| Chills                               | 2 (18)                       | 0                                |
| Hypertension                         | 3 (27)                       | 1 (9)                            |
| Arthralgia                           | 2 (18)                       | 0                                |
| Peripheral neuropathy                | 2 (18)                       | 0                                |
| Nausea                               | 7 (64)                       | 0                                |
| Vomiting                             | 3 (27)                       | 0                                |
| Abdominal pain                       | 4 (36)                       | 1 (9)                            |
| Constipation                         | 4 (36)                       | 0                                |
| Diarrhea                             | 2 (18)                       | 0                                |
| Pancreatitis                         | 2 (18)                       | 0                                |
| AST elevation                        | 2 (18)                       | 0                                |
| Rash, maculopapular                  | 3 (27)                       | 1 (9)                            |
| Pruritis                             | 4 (36)                       | 0                                |
| Palmar-plantar<br>erythrodysesthesia | 3 (27)                       | 1 (9)                            |
| Dry skin                             | 2 (18)                       | 0                                |

Toxicities seen in >10% of patients are listed, categorized by all grades and by grades 3 and 4 according to the Common Terminology Criteria for Adverse Events version 4.0.

**Table 2.** Clinical efficacy of the combination of sorafenib plus bortezomib

| <b>Outcome</b>                    | <b>Number</b> |
|-----------------------------------|---------------|
| Best response                     |               |
| Partial response                  | 0             |
| Complete response                 | 0             |
| Stable disease                    | 3             |
| Progressive disease               | 7             |
| Not evaluable for response        | 1             |
| Median number of cycles           | 4             |
| 6-month progression-free survival | 2             |

[Click here](#) to access other published clinical trials.
